# Supplementary material for: Isolation of Biofilm-Forming Staphylococci from the Bulk-Tank Milk of Small Ruminant Farms in Greece
Source: MDPI journal article supplement (doi:10.3390/foods12152836), 2023-07-26
Supplement: s1 [file s1]

# Isolation of Biofilm-Forming Staphylococci from the Bulk-Tank Milk of Small Ruminant Farms in Greece

Daphne T. Lianou, Charalambia K. Michael, Nikolaos Solomakos, Natalia G. C. Vasileiou, Efthymia Petinaki, Vasia S. Mavrogianni, Athina Tzora, Chrysoula Voidarou, and George C. Fthenakis

**Table S1.** Details of multivariable models employed for the evaluation for potential associations of the recovery of biofilm-forming staphylococci from the bulk-tank of milk in 444 small ruminant farms in Greece.

| Outcome                                                                          | Variables ( <i>n</i> )               |                                                                                                                                                  |
|----------------------------------------------------------------------------------|--------------------------------------|--------------------------------------------------------------------------------------------------------------------------------------------------|
|                                                                                  | offered to the multi-variable models | required in the final models                                                                                                                     |
| Isolation of biofilm-forming staphylococci - only farms applying machine-milking | 4 <sup>1</sup>                       | (a) Temperature of cleaning water of the milking parlour, (b) Frequency of milk collection from the tank                                         |
| Isolation of biofilm-forming staphylococci - farms applying hand-milking         | 3 <sup>2</sup>                       | (a) Season of the year when sampling was carried out, (b) Frequency of milk collection from the tank, (c) Use of teat disinfection after milking |

<sup>1</sup> Season of the year when sampling was performed, Temperature of cleaning water of the milking parlour, Frequency of milk collection from the tank, Use of teat disinfection after milking; <sup>2</sup> Season of the year when sampling was performed, Frequency of milk collection from the tank, Use of teat disinfection after milking.

**Table S2.** Cumulative information collected from 444 small ruminant farms in a countrywide investigation in Greece, classified according to animal species in the farms.

|                                                                          | Sheep flocks ( <i>n</i> = 325)                                                                                                    | Goat herds ( <i>n</i> = 199)                                                                                                  |
|--------------------------------------------------------------------------|-----------------------------------------------------------------------------------------------------------------------------------|-------------------------------------------------------------------------------------------------------------------------------|
| Management system applied in the farm                                    | Intensive: 44, semi-intensive: 140, semi-extensive: 116, extensive: 25                                                            | Intensive: 9, semi-intensive: 29, semi-extensive: 61, extensive: 20                                                           |
| No. of female animals in the farm                                        | $\bar{X}$ : 325 ± 13 ewes                                                                                                         | $\bar{X}$ : 237 ± 20 does                                                                                                     |
| Type of milking                                                          | Machine-milking: 255, hand-milking no: 70                                                                                         | Machine-milking: 66, hand-milking: 53                                                                                         |
| Annual frequency of changing teatcups                                    | Once: 130, less than once: 125                                                                                                    | Once: 29, less than once: 37                                                                                                  |
| Temperature of cleaning water of the milking parlour                     | $\bar{X}$ : 70 ± 0.5 °C                                                                                                           | $\bar{X}$ : 70 ± 1.0 °C                                                                                                       |
| Frequency of milk collection from the tank                               | Daily: 82, at least every two days: 243                                                                                           | Daily: 36, at least every two days: 83                                                                                        |
| Daily number of milking sessions                                         | 2 (1 – 3)                                                                                                                         | 2 (1 – 3)                                                                                                                     |
| Use of teat disinfection after milking                                   | Yes: 52, no: 273                                                                                                                  | Yes: 12, no: 107                                                                                                              |
| Administration of ‘dry-ewe’ treatment at the end of the lactation period | Yes: 53, no: 272                                                                                                                  | Yes: 15, no: 104                                                                                                              |
| Annual frequency of systemic disinfections in the farm                   | $\bar{X}$ : 3.6 ± 0.2 occasions                                                                                                   | $\bar{X}$ : 4.3 ± 0.5 occasions                                                                                               |
| Month into the lactation period at sampling                              | 0-1 <sup>st</sup> : 23, 2 <sup>nd</sup> -5 <sup>th</sup> : 138, 6 <sup>th</sup> -9 <sup>th</sup> : 147, over 9 <sup>th</sup> : 17 | 0-1 <sup>st</sup> : 8, 2 <sup>nd</sup> -5 <sup>th</sup> : 60, 6 <sup>th</sup> -9 <sup>th</sup> : 43, over 9 <sup>th</sup> : 8 |

39 **Table S3.** Results of univariable analysis for associations of recovery of biofilm-forming staphylococcal isolates from bulk-tank milk with the season of the year when sampling was performed  
40 in 444 small ruminant farms in Greece.

| Recovery of biofilm-forming staphylococcal isolates ( <i>n</i> = 203) |        |        |        | No recovery of biofilm-forming staphylococcal isolates ( <i>n</i> = 241) |        |        |        | <i>p</i> |
|-----------------------------------------------------------------------|--------|--------|--------|--------------------------------------------------------------------------|--------|--------|--------|----------|
| Season of the year when sampling was performed                        |        |        |        |                                                                          |        |        |        |          |
| Autumn                                                                | Winter | Spring | Summer | Autumn                                                                   | Winter | Spring | Summer |          |
| 18                                                                    | 50     | 82     | 53     | 23                                                                       | 61     | 69     | 88     | 0.040    |

**Table S4.** Isolation of biofilm-forming staphylococci from small ruminant farms during a countrywide investigation in Greece, in accord with the temperature of the water used to clean the milking parlour.

| Temperature ranges | Proportion of farms from which biofilm-forming staphylococci were isolated | <i>p</i> -value | Median (interquartile range) number of biofilm-forming staphylococci isolated per farm | <i>p</i> -value |
|--------------------|----------------------------------------------------------------------------|-----------------|----------------------------------------------------------------------------------------|-----------------|
| < 49 °C            | 88.9%                                                                      | 0.0002          | 1 (0)                                                                                  | < 0.0001        |
| 50 °C – 69 °C      | 47.9%                                                                      | 0.62            | 0 (1)                                                                                  | 0.70            |
| 70 °C – 89 °C      | 39.0%                                                                      | 0.005           | 0 (1)                                                                                  | 0.005           |
| ≥ 90 °C            | 56.0%                                                                      | 0.29            | 1 (1)                                                                                  | 0.34            |

**Table S5.** Results of univariable analysis for associations of recovery of biofilm-forming staphylococcal isolates from bulk-tank milk with management practices applied in 444 small ruminant farms in Greece.

| Recovery of biofilm-forming staphylococcal isolates ( <i>n</i> = 203)    |                |                          |           | No recovery of biofilm-forming staphylococcal isolates ( <i>n</i> = 241) |                |                          |           | <i>p</i> |
|--------------------------------------------------------------------------|----------------|--------------------------|-----------|--------------------------------------------------------------------------|----------------|--------------------------|-----------|----------|
| Management system applied in the farm                                    |                |                          |           |                                                                          |                |                          |           |          |
| Intensive                                                                | Semi-intensive | Semi-extensive           | Extensive | Intensive                                                                | Semi-intensive | Semi-extensive           | Extensive | 0.36     |
| 24                                                                       | 81             | 83                       | 15        | 29                                                                       | 88             | 94                       | 30        |          |
| No. of female animals in the farm                                        |                |                          |           |                                                                          |                |                          |           |          |
| ≤ 165                                                                    | 166 - 330      | 331 – 500                | > 500     | ≤ 165                                                                    | 166 - 330      | 331 – 500                | > 500     | 0.41     |
| 66                                                                       | 78             | 30                       | 29        | 79                                                                       | 79             | 49                       | 35        |          |
| Type of milking                                                          |                |                          |           |                                                                          |                |                          |           |          |
| Machine-milking                                                          |                | Hand-milking             |           | Machine-milking                                                          |                | Hand-milking             |           | 0.96     |
| 147                                                                      |                | 56                       |           | 174                                                                      |                | 67                       |           |          |
| Annual frequency of changing teatcups                                    |                |                          |           |                                                                          |                |                          |           |          |
| Up to annually                                                           |                | Less often than annually |           | Up to annually                                                           |                | Less often than annually |           | 0.53     |
| 70                                                                       |                | 77                       |           | 89                                                                       |                | 85                       |           |          |
| Temperature of cleaning water of the milking parlour (°C)                |                |                          |           |                                                                          |                |                          |           |          |
| < 49                                                                     | 50 – 69        | 70 – 89                  | ≥ 90      | < 49                                                                     | 50 – 69        | 70 – 89                  | ≥ 90      | 0.0004   |
| 16                                                                       | 46             | 71                       | 14        | 2                                                                        | 50             | 111                      | 11        |          |
| Frequency of milk collection from the tank (days)                        |                |                          |           |                                                                          |                |                          |           |          |
| Daily                                                                    |                | At least every two days  |           | Daily                                                                    |                | At least every two days  |           | 0.05     |
| 45                                                                       |                | 158                      |           | 73                                                                       |                | 168                      |           |          |
| Daily number of milking sessions                                         |                |                          |           |                                                                          |                |                          |           |          |
| One                                                                      | Two            | Three                    |           | One                                                                      | Two            | Three                    |           | 0.65     |
| 2                                                                        | 167            | 34                       |           | 3                                                                        | 205            | 33                       |           |          |
| Use of teat disinfection after milking                                   |                |                          |           |                                                                          |                |                          |           |          |
| Yes                                                                      |                | No                       |           | Yes                                                                      |                | No                       |           | 0.17     |
| 34                                                                       |                | 167                      |           | 30                                                                       |                | 213                      |           |          |
| Administration of ‘dry-ewe’ treatment at the end of the lactation period |                |                          |           |                                                                          |                |                          |           |          |
| Yes                                                                      |                | No                       |           | Yes                                                                      |                | No                       |           | 0.30     |
| 35                                                                       |                | 168                      |           | 33                                                                       |                | 208                      |           |          |
| Annual frequency of systemic disinfections in the farm                   |                |                          |           |                                                                          |                |                          |           |          |
| Median: 2 (interquartile range: 2)                                       |                |                          |           | Median: 2 (interquartile range: 2)                                       |                |                          |           | 0.38     |

| Month into the lactation period at sampling |                                  |                                  |                      |                   |                                  |                                  |                      |
|---------------------------------------------|----------------------------------|----------------------------------|----------------------|-------------------|----------------------------------|----------------------------------|----------------------|
| 0-1 <sup>st</sup>                           | 2 <sup>nd</sup> -5 <sup>th</sup> | 6 <sup>th</sup> -9 <sup>th</sup> | Over 9 <sup>th</sup> | 0-1 <sup>st</sup> | 2 <sup>nd</sup> -5 <sup>th</sup> | 6 <sup>th</sup> -9 <sup>th</sup> | Over 9 <sup>th</sup> |
| 16                                          | 89                               | 89                               | 9                    | 15                | 109                              | 101                              | 16                   |
|                                             |                                  |                                  |                      |                   |                                  |                                  | 0.68                 |

**Table S6.** Parametres of the bulk-tank milk of 444 small ruminant farms in Greece in accord with the isolation of biofilm-forming staphylococci from the milk.

| Parameters                          | Isolation of biofilm-forming staphylococci                                                          | Isolation of non biofilm-forming staphylococci                                                      | No isolation of staphylococci                                                                       | ls means (sem)                                                            | <i>p</i> -value |
|-------------------------------------|-----------------------------------------------------------------------------------------------------|-----------------------------------------------------------------------------------------------------|-----------------------------------------------------------------------------------------------------|---------------------------------------------------------------------------|-----------------|
| Sheep flocks ( <i>n</i> = 325)      |                                                                                                     |                                                                                                     |                                                                                                     |                                                                           |                 |
| Somatic cell counts <sup>1</sup>    | 0.575 × 10 <sup>6</sup> (0.518 × 10 <sup>6</sup> - 0.638 × 10 <sup>6</sup> ) cells mL <sup>-1</sup> | 0.503 × 10 <sup>6</sup> (0.430 × 10 <sup>6</sup> - 0.587 × 10 <sup>6</sup> ) cells mL <sup>-1</sup> | 0.385 × 10 <sup>6</sup> (0.333 × 10 <sup>6</sup> - 0.442 × 10 <sup>6</sup> ) cells mL <sup>-1</sup> | 0.479 × 10 <sup>6</sup> (0.013 × 10 <sup>6</sup> ) cells mL <sup>-1</sup> | < 0.0001        |
| Total bacterial counts <sup>1</sup> | 499 × 10 <sup>3</sup> (372 × 10 <sup>3</sup> - 676 × 10 <sup>3</sup> ) cfu mL <sup>-1</sup>         | 378 × 10 <sup>3</sup> (245 × 10 <sup>3</sup> - 575 × 10 <sup>3</sup> ) cfu mL <sup>-1</sup>         | 308 × 10 <sup>3</sup> (240 × 10 <sup>3</sup> - 398 × 10 <sup>3</sup> ) cfu mL <sup>-1</sup>         | 387 × 10 <sup>3</sup> (1 × 10 <sup>3</sup> ) cfu mL <sup>-1</sup>         | 0.046           |
| Fat content <sup>2</sup>            | 6.08% ± 0.07%                                                                                       | 6.17% ± 0.11%                                                                                       | 6.26% ± 0.08%                                                                                       | 6.17% (0.03%)                                                             | 0.22            |
| Protein content <sup>2</sup>        | 4.42% ± 0.02%                                                                                       | 4.46% ± 0.03%                                                                                       | 4.42% ± 0.02%                                                                                       | 4.43% (0.01%)                                                             | 0.59            |
| Lactose content <sup>2</sup>        | 4.19% ± 0.02%                                                                                       | 4.24% ± 0.03%                                                                                       | 4.21% ± 0.02%                                                                                       | 4.22% (0.02%)                                                             | 0.41            |
| Goat herds ( <i>n</i> = 119)        |                                                                                                     |                                                                                                     |                                                                                                     |                                                                           |                 |
| Somatic cell counts <sup>1</sup>    | 0.879 × 10 <sup>6</sup> (0.764 × 10 <sup>6</sup> - 1.009 × 10 <sup>6</sup> ) cells mL <sup>-1</sup> | 0.871 × 10 <sup>6</sup> (0.689 × 10 <sup>6</sup> - 1.104 × 10 <sup>6</sup> ) cells mL <sup>-1</sup> | 0.777 × 10 <sup>6</sup> (0.647 × 10 <sup>6</sup> - 0.935 × 10 <sup>6</sup> ) cells mL <sup>-1</sup> | 0.842 × 10 <sup>6</sup> (0.013 × 10 <sup>6</sup> ) cells mL <sup>-1</sup> | 0.53            |
| Total bacterial counts <sup>1</sup> | 633 × 10 <sup>3</sup> (417 × 10 <sup>3</sup> - 955 × 10 <sup>3</sup> ) cfu mL <sup>-1</sup>         | 723 × 10 <sup>3</sup> (372 × 10 <sup>3</sup> - 1413 × 10 <sup>3</sup> ) cfu mL <sup>-1</sup>        | 507 × 10 <sup>3</sup> (339 × 10 <sup>3</sup> - 759 × 10 <sup>3</sup> ) cfu mL <sup>-1</sup>         | 608 × 10 <sup>3</sup> (1 × 10 <sup>3</sup> ) cfu mL <sup>-1</sup>         | 0.62            |
| Fat content <sup>2</sup>            | 4.78% ± 0.15%                                                                                       | 4.38% ± 0.26%                                                                                       | 4.93% ± 0.20%                                                                                       | 4.73% (0.09%)                                                             | 0.25            |
| Protein content <sup>2</sup>        | 3.20% ± 0.03%                                                                                       | 3.22% ± 0.05%                                                                                       | 3.27% ± 0.06%                                                                                       | 3.25% (0.02%)                                                             | 0.56            |
| Lactose content <sup>2</sup>        | 4.77% ± 0.04%                                                                                       | 4.82% ± 0.05%                                                                                       | 4.67% ± 0.06%                                                                                       | 4.74% (0.01%)                                                             | 0.14            |

<sup>1</sup> mean (95% confidence intervals); <sup>2</sup> mean ± standard error of the mean.
